# Supplementary material
Source: PubMed Central journal article supplement (PMC7245347)

**Supplementary Figure 1. Analytic population**

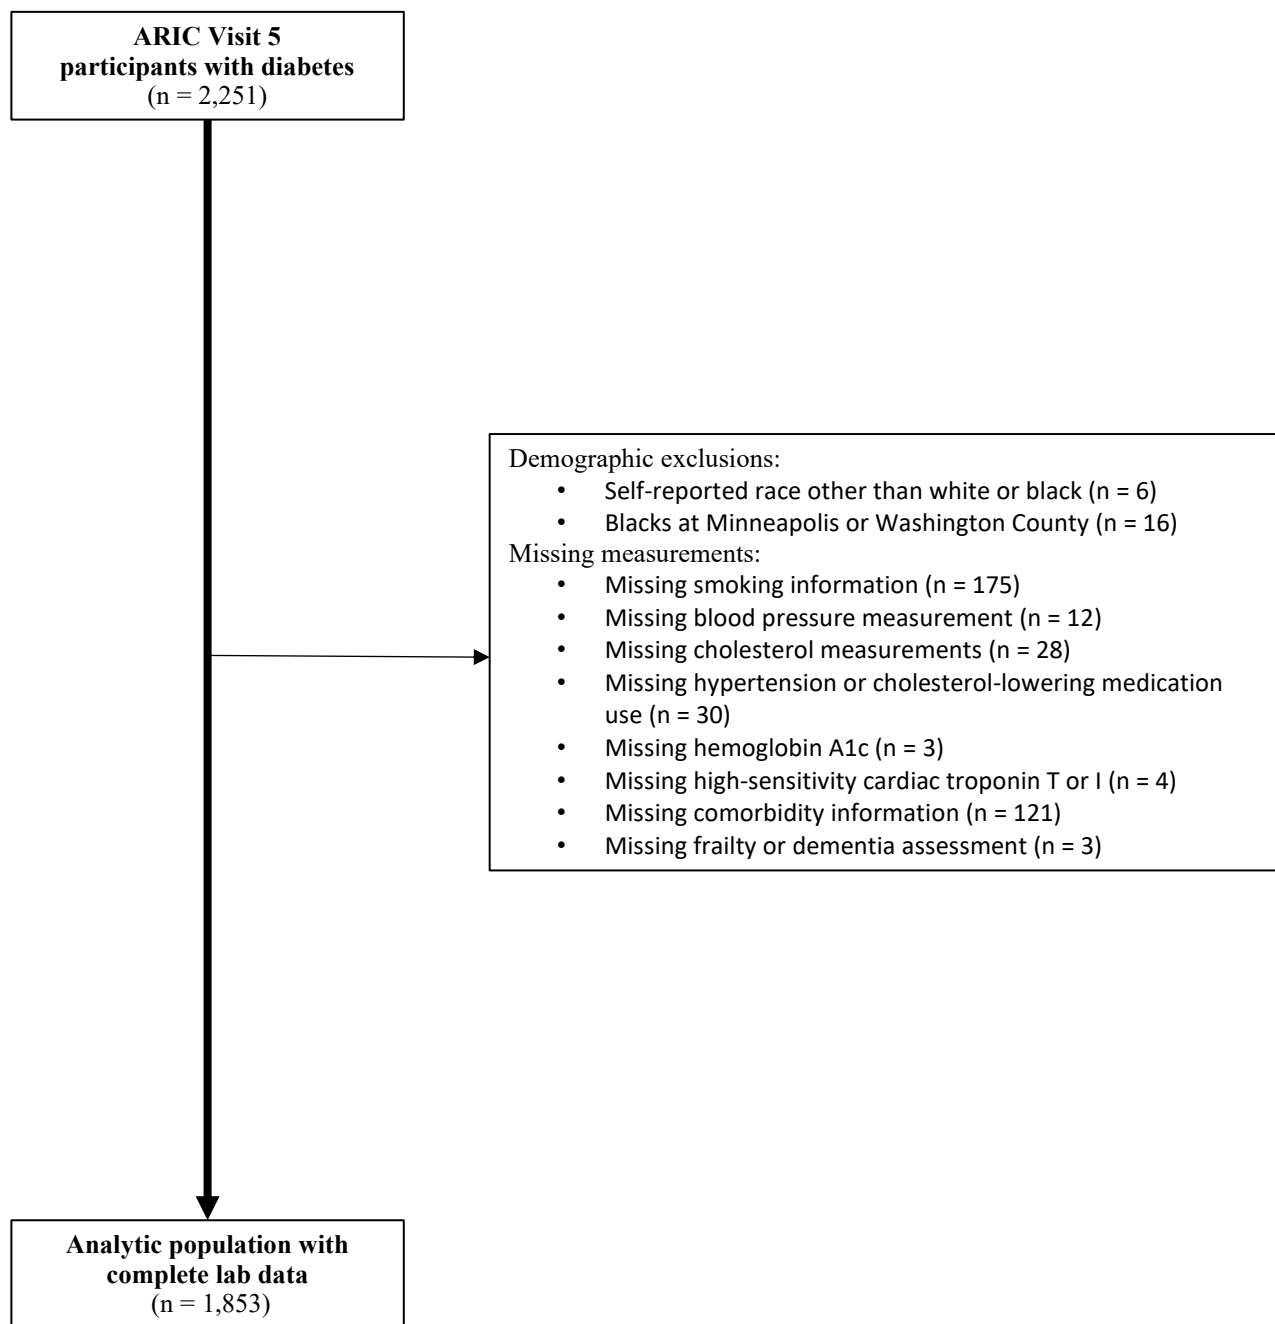

SUPPLEMENTARY DATA

**Supplementary Table 1.** Baseline characteristics of older adults with diabetes according to hs-cTnI categories, the Atherosclerosis Risk in Communities (ARIC) Study, Visit 5 (2011-2013), N=1,738

|                                      | Percentile range | hs-cTnI categories |               |               |               |              |
|--------------------------------------|------------------|--------------------|---------------|---------------|---------------|--------------|
|                                      |                  | <40th              | 40th to <55th | 55th to <70th | 70th to <85th | ≥85th        |
| N                                    |                  | 727                | 270           | 281           | 296           | 279          |
| Visit 5 age, mean (SD)               |                  | 74.0 (4.5)         | 76.0 (4.7)    | 75.5 (5.0)    | 77.4 (5.6)    | 76.9 (5.6)   |
| Male                                 |                  | 239 (32.9%)        | 102 (37.8%)   | 138 (49.1%)   | 147 (49.7%)   | 168 (60.2%)  |
| Black race                           |                  | 187 (25.7%)        | 81 (30.0%)    | 96 (34.2%)    | 83 (28.0%)    | 120 (43.0%)  |
| Current smoker                       |                  | 42 (5.8%)          | 14 (5.2%)     | 18 (6.4%)     | 11 (3.7%)     | 22 (7.9%)    |
| Blood pressure                       |                  |                    |               |               |               |              |
| Systolic                             |                  | 127.5 (16.5)       | 129.5 (18.5)  | 132.0 (20.5)  | 134.1 (19.6)  | 132.8 (20.9) |
| Diastolic                            |                  | 65.4 (10.2)        | 64.7 (10.1)   | 65.7 (10.8)   | 64.7 (11.7)   | 63.6 (11.9)  |
| Hypertension medication use          |                  | 541 (74.4%)        | 218 (80.7%)   | 247 (87.9%)   | 259 (87.5%)   | 245 (87.8%)  |
| Total cholesterol, mmol/L, mean (SD) |                  | 4.5 (1.0)          | 4.5 (1.0)     | 4.2 (1.1)     | 4.3 (1.1)     | 4.3 (1.1)    |
| HDL-Cholesterol, mmol/L, mean (SD)   |                  | 1.3 (0.3)          | 1.2 (0.3)     | 1.2 (0.3)     | 1.2 (0.3)     | 1.2 (0.3)    |
| Cholesterol-lowering medication use  |                  | 491 (67.5%)        | 181 (67.0%)   | 214 (76.2%)   | 210 (70.9%)   | 202 (72.4%)  |
| ADA Comorbidities                    |                  |                    |               |               |               |              |
| Coronary heart disease               |                  | 76 (10.5%)         | 45 (16.7%)    | 60 (21.4%)    | 83 (28.0%)    | 99 (35.5%)   |
| Heart failure                        |                  | 87 (12.0%)         | 56 (20.7%)    | 68 (24.2%)    | 100 (33.8%)   | 119 (42.7%)  |
| Stroke                               |                  | 22 (3.0%)          | 14 (5.2%)     | 16 (5.7%)     | 23 (7.8%)     | 23 (8.2%)    |
| Arthritis                            |                  | 496 (68.2%)        | 202 (74.8%)   | 198 (70.5%)   | 222 (75.0%)   | 210 (75.3%)  |
| Cancer                               |                  | 162 (22.3%)        | 56 (20.7%)    | 70 (24.9%)    | 73 (24.7%)    | 76 (27.2%)   |
| Chronic Kidney Disease, Stage 3+     |                  | 206 (28.3%)        | 131 (48.5%)   | 140 (49.8%)   | 183 (61.8%)   | 179 (64.2%)  |
| Depression                           |                  | 20 (2.8%)          | 8 (3.0%)      | 11 (3.9%)     | 7 (2.4%)      | 13 (4.7%)    |
| Emphysema or COPD                    |                  | 54 (7.4%)          | 20 (7.4%)     | 14 (5.0%)     | 23 (7.8%)     | 30 (10.8%)   |
| History of hospitalized fall         |                  | 22 (3.0%)          | 8 (3.0%)      | 10 (3.6%)     | 13 (4.4%)     | 15 (5.4%)    |
| History of severe hypoglycemia       |                  | 7 (1.0%)           | 11 (4.1%)     | 8 (2.8%)      | 15 (5.1%)     | 15 (5.4%)    |
| Hypertension                         |                  | 573 (78.8%)        | 229 (84.8%)   | 253 (90.0%)   | 267 (90.2%)   | 256 (91.8%)  |

SUPPLEMENTARY DATA

|                                |                 |                  |                   |                   |                   |
|--------------------------------|-----------------|------------------|-------------------|-------------------|-------------------|
| Incontinence                   | 76 (10.5%)      | 39 (14.4%)       | 34 (12.1%)        | 42 (14.2%)        | 43 (15.4%)        |
| Geriatric syndromes            |                 |                  |                   |                   |                   |
| Dementia                       | 15 (2.1%)       | 13 (4.8%)        | 15 (5.3%)         | 23 (7.8%)         | 27 (9.7%)         |
| Frailty                        | 41 (5.6%)       | 18 (6.7%)        | 31 (11.0%)        | 58 (19.6%)        | 44 (15.8%)        |
| hs-cTnI, ng/L, median (Q1, Q3) | 2.1 (1.6, 2.5)  | 3.4 (3.2, 3.7)   | 4.5 (4.2, 4.9)    | 6.7 (6.0, 7.8)    | 16.7 (11.5, 27.3) |
| hs-cTnT, ng/L, median (Q1, Q3) | 9.0 (6.0, 12.0) | 11.0 (9.0, 16.0) | 13.0 (10.0, 19.0) | 16.5 (12.0, 22.0) | 26.0 (16.0, 40.0) |
| Hemoglobin A1c, %, mean(SD)    | 6.5 (1.0)       | 6.6 (1.0)        | 6.7 (1.0)         | 6.7 (1.2)         | 6.8 (1.3)         |
| Diabetes medication use        |                 |                  |                   |                   |                   |
| No medication                  | 335 (46.1%)     | 119 (44.1%)      | 102 (36.3%)       | 119 (40.2%)       | 98 (35.1%)        |
| Oral(s) only                   | 327 (45.0%)     | 116 (43.0%)      | 124 (44.1%)       | 121 (40.9%)       | 111 (39.8%)       |
| Insulin only                   | 30 (4.1%)       | 13 (4.8%)        | 22 (7.8%)         | 25 (8.4%)         | 43 (15.4%)        |
| Insulin and oral(s)            | 35 (4.8%)       | 22 (8.1%)        | 33 (11.7%)        | 31 (10.5%)        | 27 (9.7%)         |

Abbreviations: COPD – chronic obstructive pulmonary disease; hs-cTnI – high-sensitivity cardiac troponin I; hs-cTnT – high-sensitivity cardiac troponin T

SUPPLEMENTARY DATA

**Supplementary Table 2.** Baseline characteristics of older adults with diabetes according to hs-cTnT categories, the Atherosclerosis Risk in Communities (ARIC) Study, Visit 5 (2011-2013), N=1,738

|                                      | Percentile range | hs-cTnT categories |               |               |               |              |
|--------------------------------------|------------------|--------------------|---------------|---------------|---------------|--------------|
|                                      |                  | <40th              | 40th to <55th | 55th to <70th | 70th to <85th | ≥85th        |
| N                                    |                  | 741                | 228           | 319           | 286           | 279          |
| Visit 5 age, mean (SD)               |                  | 73.8 (4.3)         | 75.7 (4.8)    | 76.1 (5.3)    | 76.7 (5.1)    | 78.1 (5.6)   |
| Male                                 |                  | 192 (25.9%)        | 87 (38.2%)    | 153 (48.0%)   | 169 (59.1%)   | 193 (69.2%)  |
| Black race                           |                  | 204 (27.5%)        | 73 (32.0%)    | 103 (32.3%)   | 88 (30.8%)    | 99 (35.5%)   |
| Current smoker                       |                  | 52 (7.0%)          | 11 (4.8%)     | 13 (4.1%)     | 16 (5.6%)     | 15 (5.4%)    |
| Blood pressure                       |                  |                    |               |               |               |              |
| Systolic                             |                  | 129.4 (17.8)       | 132.0 (19.4)  | 130.1 (18.6)  | 131.1 (19.7)  | 130.8 (20.2) |
| Diastolic                            |                  | 66.1 (10.2)        | 65.3 (11.2)   | 65.5 (11.1)   | 63.8 (10.3)   | 62.1 (11.8)  |
| Hypertension medication use          |                  | 574 (77.5%)        | 182 (79.8%)   | 268 (84.0%)   | 246 (86.0%)   | 240 (86.0%)  |
| Total cholesterol, mmol/L, mean (SD) |                  | 4.5 (1.1)          | 4.5 (1.0)     | 4.3 (1.0)     | 4.2 (1.0)     | 4.2 (1.2)    |
| HDL-Cholesterol, mmol/L, mean (SD)   |                  | 1.3 (0.3)          | 1.3 (0.3)     | 1.2 (0.3)     | 1.2 (0.3)     | 1.1 (0.3)    |
| Cholesterol-lowering medication use  |                  | 493 (66.5%)        | 159 (69.7%)   | 224 (70.2%)   | 209 (73.1%)   | 213 (76.3%)  |
| ADA Comorbidities                    |                  |                    |               |               |               |              |
| Coronary heart disease               |                  | 81 (10.9%)         | 42 (18.4%)    | 59 (18.5%)    | 78 (27.3%)    | 103 (36.9%)  |
| Heart failure                        |                  | 104 (14.0%)        | 51 (22.4%)    | 68 (21.3%)    | 78 (27.3%)    | 129 (46.2%)  |
| Stroke                               |                  | 24 (3.2%)          | 5 (2.2%)      | 23 (7.2%)     | 19 (6.6%)     | 27 (9.7%)    |
| Arthritis                            |                  | 521 (70.3%)        | 155 (68.0%)   | 232 (72.7%)   | 205 (71.7%)   | 215 (77.1%)  |
| Cancer                               |                  | 145 (19.6%)        | 52 (22.8%)    | 82 (25.7%)    | 71 (24.8%)    | 87 (31.2%)   |
| Chronic Kidney Disease, Stage 3+     |                  | 210 (28.3%)        | 93 (40.8%)    | 158 (49.5%)   | 169 (59.1%)   | 209 (74.9%)  |
| Depression                           |                  | 24 (3.2%)          | 5 (2.2%)      | 8 (2.5%)      | 9 (3.1%)      | 13 (4.7%)    |
| Emphysema or COPD                    |                  | 50 (6.7%)          | 16 (7.0%)     | 21 (6.6%)     | 22 (7.7%)     | 32 (11.5%)   |
| History of hospitalized fall         |                  | 20 (2.7%)          | 9 (3.9%)      | 12 (3.8%)     | 12 (4.2%)     | 15 (5.4%)    |
| History of severe hypoglycemia       |                  | 10 (1.3%)          | 8 (3.5%)      | 8 (2.5%)      | 9 (3.1%)      | 21 (7.5%)    |
| Hypertension                         |                  | 602 (81.2%)        | 195 (85.5%)   | 275 (86.2%)   | 256 (89.5%)   | 250 (89.6%)  |



SUPPLEMENTARY DATA

|                                |                |                   |                   |                   |                   |
|--------------------------------|----------------|-------------------|-------------------|-------------------|-------------------|
| Incontinence                   | 79 (10.7%)     | 27 (11.8%)        | 42 (13.2%)        | 38 (13.3%)        | 48 (17.2%)        |
| Geriatric syndromes            |                |                   |                   |                   |                   |
| Dementia                       | 20 (2.7%)      | 11 (4.8%)         | 16 (5.0%)         | 15 (5.2%)         | 31 (11.1%)        |
| Frailty                        | 39 (5.3%)      | 22 (9.6%)         | 28 (8.8%)         | 49 (17.1%)        | 54 (19.4%)        |
| hs-cTnl, ng/L, median (Q1, Q3) | 2.5 (1.8, 3.6) | 3.6 (2.5, 5.1)    | 4.0 (2.7, 5.7)    | 5.3 (3.6, 8.3)    | 10.0 (5.3, 20.9)  |
| hs-cTnT, ng/L, median (Q1, Q3) | 7.0 (5.0, 9.0) | 11.0 (11.0, 12.0) | 14.0 (13.0, 15.0) | 20.0 (18.0, 22.0) | 35.0 (29.0, 47.0) |
| Hemoglobin A1c, %, mean(SD)    | 6.4 (1.0)      | 6.6 (1.1)         | 6.6 (1.1)         | 6.8 (1.2)         | 6.8 (1.3)         |
| Diabetes medication use        |                |                   |                   |                   |                   |
| No medication                  | 363 (49.0%)    | 101 (44.3%)       | 125 (39.2%)       | 94 (32.9%)        | 90 (32.3%)        |
| Oral(s) only                   | 313 (42.2%)    | 100 (43.9%)       | 145 (45.5%)       | 131 (45.8%)       | 110 (39.4%)       |
| Insulin only                   | 29 (3.9%)      | 10 (4.4%)         | 22 (6.9%)         | 25 (8.7%)         | 47 (16.8%)        |
| Insulin and oral(s)            | 36 (4.9%)      | 17 (7.5%)         | 27 (8.5%)         | 36 (12.6%)        | 32 (11.5%)        |

Abbreviations: COPD – chronic obstructive pulmonary disease; hs-cTnl – high-sensitivity cardiac troponin I; hs-cTnT – high-sensitivity cardiac troponin T

**Supplementary Figure 2.** Hazard ratios (95% confidence interval) of the association of hs-cTnI and hs-cTnT percentile categories with all-cause mortality among those without prevalent cardiovascular disease (N = 1,212), adjusted for age, male sex, race-center, current smoking, systolic blood pressure, diastolic blood pressure, anti-hypertensive medication use, total cholesterol, HDL-cholesterol, cholesterol-lowering medication use, and hemoglobin A1c.

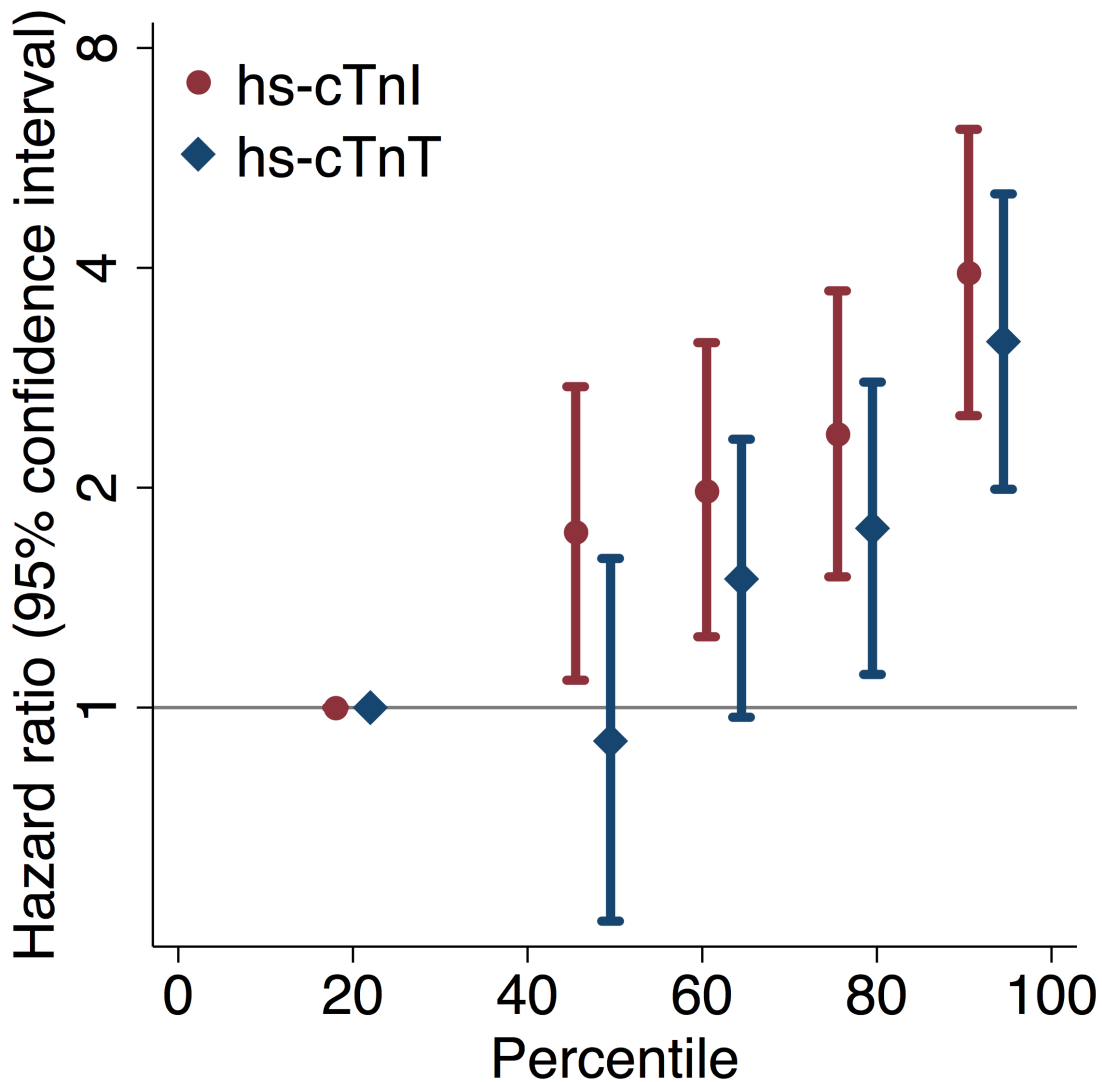

SUPPLEMENTARY DATA

**Supplementary Table 3.** Sensitivity specificity likelihood ratios (LR) positive predictive value (PPV) and negative predictive value (NPV) associated with representative hs-cTnI and hs-cTnT cutpoints at the 90<sup>th</sup>, 95<sup>th</sup>, and 99<sup>th</sup> percentile in the ARIC cohort with diabetes (N= 1,853).

|                | <b>Cutpoint</b> | <b>Sensitivity</b> | <b>Specificity</b> | <b>LR+</b> | <b>LR-</b> | <b>PPV</b> | <b>NPV</b> |
|----------------|-----------------|--------------------|--------------------|------------|------------|------------|------------|
| <b>hs-cTnI</b> | 12.9 ng/L       | 22%                | 93%                | 3.4        | 0.8        | 49%        | 80%        |
|                | 23.0 ng/L       | 11%                | 97%                | 3.5        | 0.9        | 51%        | 79%        |
|                | 67.9 ng/mL      | 2%                 | 99%                | 3.1        | 1.0        | 47%        | 79%        |
| <b>hs-cTnT</b> | 30.0 ng/L       | 27%                | 94%                | 4.5        | 0.8        | 57%        | 82%        |
|                | 41.0 ng/L       | 15%                | 98%                | 6.5        | 0.9        | 65%        | 80%        |
|                | 76.0 ng/mL      | 4%                 | 99.7%              | 12.9       | 1.0        | 76%        | 78%        |

SUPPLEMENTARY DATA

**Supplementary Table 4.** Percent (95% confidence interval) reclassified based on addition of hs-cTnI or hs-cTnT to base models for all-cause mortality.

|                                         | Died                        |                             | Did not die                 |                             | Weighted NRI<br>(compared to<br>base model) |
|-----------------------------------------|-----------------------------|-----------------------------|-----------------------------|-----------------------------|---------------------------------------------|
|                                         | Increased<br>Predicted Risk | Decreased<br>Predicted Risk | Increased<br>Predicted Risk | Decreased<br>Predicted Risk |                                             |
| <b>Base Model*</b>                      | -                           | -                           | -                           | -                           | -                                           |
| + comorbidity burden (≥3 comorbidities) | 17.3 (15.5, 19.0)           | 5.3 (4.3, 6.3)              | 42.1 (39.8, 44.5)           | 35.2 (33.0, 37.4)           | 0.06 (0.001, 0.11)                          |
| + hs-cTnI ≥ 85th percentile             | 7.7 (6.5, 9.0)              | 14.8 (13.3, 16.4)           | 15.4 (13.8, 17.1)           | 61.9 (59.6, 64.2)           | 0.39 (0.34, 0.44)                           |
| + log <sub>2</sub> (hs-cTnI)            | 11.3 (9.9, 12.7)            | 11.3 (9.8, 12.7)            | 25.3 (23.3, 27.2)           | 52.1 (49.8, 54.4)           | 0.30 (0.24, 0.35)                           |
| + hs-cTnT ≥ 85th percentile             | 9.0 (7.6, 10.3)             | 13.6 (12.1, 15.1)           | 20.6 (18.8, 22.3)           | 56.8 (54.6, 59.0)           | 0.31 (0.26, 0.36)                           |
| + log <sub>2</sub> (hs-cTnT)            | 12.5 (11.0, 13.9)           | 10.1 (8.7, 11.4)            | 27.7 (25.7, 29.7)           | 49.6 (47.4, 52.0)           | 0.26 (0.21, 0.32)                           |

\* Age, male sex, race-center, current smoking, systolic blood pressure, diastolic blood pressure, anti-hypertensive medication use, total cholesterol, HDL-cholesterol, cholesterol-lowering medication use, and hemoglobin A1c

SUPPLEMENTARY DATA

**Supplementary Table 5.** Percent (95% confidence interval) reclassified based on addition of hs-cTnI or hs-cTnT to base models with comorbidity burden for all-cause mortality

|                                                                                      | Died                     |                          | Did not die              |                          | Weighted NRI      |
|--------------------------------------------------------------------------------------|--------------------------|--------------------------|--------------------------|--------------------------|-------------------|
|                                                                                      | Increased Predicted Risk | Decreased Predicted Risk | Increased Predicted Risk | Decreased Predicted Risk |                   |
| <b>Base Model* with comorbidity burden (≥3 comorbidities)</b>                        | -                        | -                        | -                        | -                        | -                 |
| + hs-cTnI ≥ 85th percentile                                                          | 7.6 (6.4, 8.8)           | 14.9 (13.4, 16.5)        | 18.8 (17.0, 20.6)        | 58.6 (56.3, 60.9)        | 0.32 (0.26, 0.37) |
| + log2(hs-cTnI)                                                                      | 11.2 (9.8, 12.6)         | 11.4 (10.0, 12.8)        | 27.3 (25.3, 29.3)        | 50.0 (47.7, 52.3)        | 0.24 (0.19, 0.30) |
| + hs-cTnT ≥ 85th percentile                                                          | 9.3 (7.9, 10.6)          | 13.3 (11.8, 14.8)        | 25.5 (23.6, 27.4)        | 51.9 (49.6, 54.1)        | 0.22 (0.16, 0.27) |
| + log2(hs-cTnT)                                                                      | 12.4 (10.9, 13.8)        | 10.2 (8.9, 11.5)         | 29.4 (27.3, 31.5)        | 47.9 (45.6, 50.3)        | 0.23 (0.18, 0.29) |
| <b>Base Model* with comorbidity burden (≥3 comorbidities or dementia or frailty)</b> | -                        | -                        | -                        | -                        | -                 |
| + hs-cTnI ≥ 85th percentile                                                          | 7.6 (6.3, 8.8)           | 15.0 (13.3, 16.7)        | 18.8 (17.1, 20.6)        | 58.5 (56.3, 60.7)        | 0.32 (0.27, 0.36) |
| + log2(hs-cTnI)                                                                      | 11.1 (9.7, 12.5)         | 11.5 (10.1, 12.9)        | 27.4 (25.3, 29.4)        | 50.0 (47.6, 52.3)        | 0.24 (0.18, 0.29) |
| + hs-cTnT ≥ 85th percentile                                                          | 9.1 (7.8, 10.5)          | 13.4 (11.9, 15.0)        | 25.0 (23.2, 26.9)        | 52.3 (50.0, 54.6)        | 0.22 (0.17, 0.27) |
| + log2(hs-cTnT)                                                                      | 12.3 (10.8, 13.8)        | 10.3 (8.9, 11.6)         | 29.4 (27.3, 31.5)        | 47.9 (45.6, 50.3)        | 0.23 (0.17, 0.28) |

\* Age, male sex, race-center, current smoking, systolic blood pressure, diastolic blood pressure, anti-hypertensive medication use, total cholesterol, HDL-cholesterol, cholesterol-lowering medication use, and hemoglobin A1c

**Supplementary Figure 3.** Hazard ratios (95% confidence interval) of all-cause mortality associated with cross-categories of high hs-cTnI or high hs-cTnT and high comorbidity burden or dementia or frailty, adjusted for age, male sex, race-center, smoking, systolic blood pressure, diastolic blood pressure, anti-hypertensive medication use, total cholesterol, HDL-cholesterol, cholesterol-lowering medication use, and hemoglobin A1c

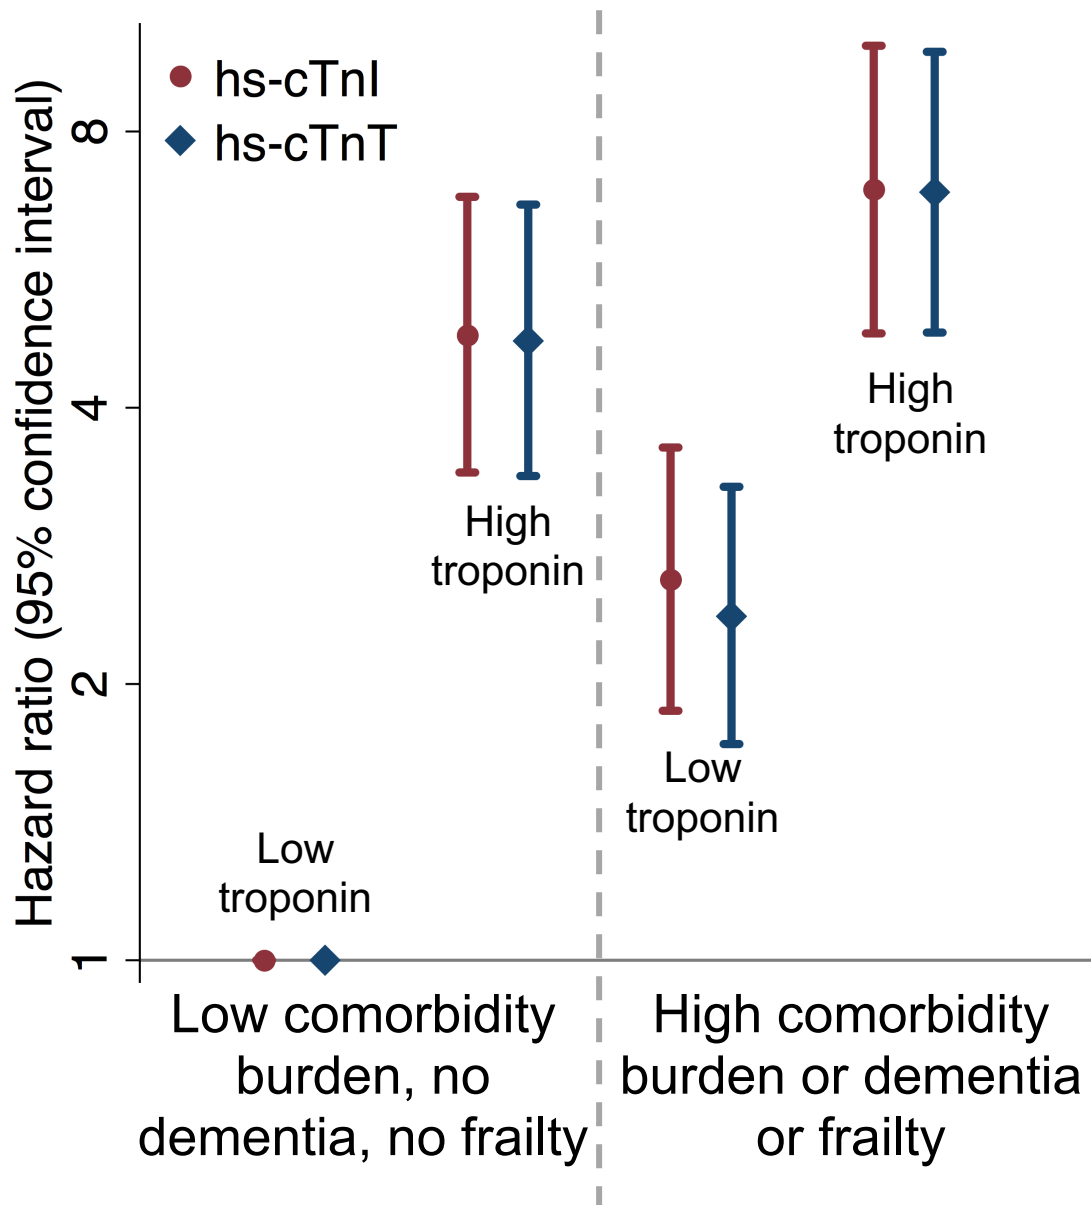

Supplement: DC192043SupplementaryData.pdf [file DC192043SupplementaryData.pdf]
